# Supplementary material
Source: publisher figshare collection journal article supplement (https://sage.figshare.com/ndownloader/files/17384492)
Supplement: Supplementary file 1 [file 17384492]

# Supplementary File 1

## Enhancing transparency in reporting the synthesis of qualitative research: the ENTREQ statement

| No | Item                       | Guide and description                                                                                                                                                                                                                                                                                                                                                                                             | Reported on page # |
|----|----------------------------|-------------------------------------------------------------------------------------------------------------------------------------------------------------------------------------------------------------------------------------------------------------------------------------------------------------------------------------------------------------------------------------------------------------------|--------------------|
| 1  | Aim                        | State the research question the synthesis addresses.                                                                                                                                                                                                                                                                                                                                                              | 1                  |
| 2  | Synthesis methodology      | Identify the synthesis methodology or theoretical framework which underpins the synthesis, and describe the rationale for choice of methodology ( <i>e.g. meta-ethnography, thematic synthesis, critical interpretive synthesis, grounded theory synthesis, realist synthesis, meta-aggregation, meta-study, framework synthesis</i> ).                                                                           | 5                  |
| 3  | Approach to searching      | Indicate whether the search was pre-planned ( <i>comprehensive search strategies to seek all available studies</i> ) or iterative ( <i>to seek all available concepts until they theoretical saturation is achieved</i> ).                                                                                                                                                                                        | 5                  |
| 4  | Inclusion criteria         | Specify the inclusion/exclusion criteria ( <i>e.g. in terms of population, language, year limits, type of publication, study type</i> ).                                                                                                                                                                                                                                                                          | 5-6                |
| 5  | Data sources               | Describe the information sources used ( <i>e.g. electronic databases (MEDLINE, EMBASE, CINAHL, psycINFO, Econlit), grey literature databases (digital thesis, policy reports), relevant organisational websites, experts, information specialists, generic web searches (Google Scholar) hand searching, reference lists</i> ) and when the searches conducted; provide the rationale for using the data sources. | 5                  |
| 6  | Electronic Search strategy | Describe the literature search ( <i>e.g. provide electronic search strategies with population terms, clinical or health topic terms, experiential or social phenomena related terms, filters for qualitative research, and search limits</i> ).                                                                                                                                                                   | 6                  |
| 7  | Study screening methods    | Describe the process of study screening and sifting ( <i>e.g. title, abstract and full text review, number of independent reviewers who screened studies</i> ).                                                                                                                                                                                                                                                   | 6-7                |
| 8  | Study characteristics      | Present the characteristics of the included studies ( <i>e.g. year of publication, country, population, number of participants, data collection, methodology, analysis, research questions</i> ).                                                                                                                                                                                                                 | 12 (Table 3)       |
| 9  | Study selection results    | Identify the number of studies screened and provide reasons for study exclusion ( <i>e.g. for comprehensive searching, provide numbers of studies screened and reasons for exclusion indicated in a figure/flowchart; for iterative searching describe reasons for study exclusion and inclusion based on modifications to the research question and/or contribution to theory development</i> ).                 | 8                  |
| 10 | Rationale for appraisal    | Describe the rationale and approach used to appraise the included studies or selected findings ( <i>e.g. assessment of</i>                                                                                                                                                                                                                                                                                        | 7                  |

| No | Item                 | Guide and description                                                                                                                                                                                                                                                                               | Reported on page # |
|----|----------------------|-----------------------------------------------------------------------------------------------------------------------------------------------------------------------------------------------------------------------------------------------------------------------------------------------------|--------------------|
|    |                      | <i>conduct (validity and robustness), assessment of reporting (transparency), assessment of content and utility of the findings).</i>                                                                                                                                                               |                    |
| 11 | Appraisal items      | State the tools, frameworks and criteria used to appraise the studies or selected findings ( <i>e.g. Existing tools: CASP, QARI, COREQ, Mays and Pope[25]; reviewer developed tools; describe the domains assessed: research team, study design, data analysis and interpretations, reporting).</i> | 7                  |
| 12 | Appraisal process    | Indicate whether the appraisal was conducted independently by more than one reviewer and if consensus was required.                                                                                                                                                                                 | 7                  |
| 13 | Appraisal results    | Present results of the quality assessment and indicate which articles, if any, were weighted/excluded based on the assessment and give the rationale.                                                                                                                                               | 8-9                |
| 14 | Data extraction      | Indicate which sections of the primary studies were analysed and how were the data extracted from the primary studies? ( <i>e.g. all text under the headings "results /conclusions" were extracted electronically and entered into a computer software).</i>                                        | 7                  |
| 15 | Software             | State the computer software used, if any.                                                                                                                                                                                                                                                           | 7                  |
| 16 | Number of reviewers  | Identify who was involved in coding and analysis.                                                                                                                                                                                                                                                   | 7                  |
| 17 | Coding               | Describe the process for coding of data ( <i>e.g. line by line coding to search for concepts).</i>                                                                                                                                                                                                  | 7                  |
| 18 | Study comparison     | Describe how were comparisons made within and across studies ( <i>e.g. subsequent studies were coded into pre-existing concepts, and new concepts were created when deemed necessary).</i>                                                                                                          | 7                  |
| 19 | Derivation of themes | Explain whether the process of deriving the themes or constructs was inductive or deductive.                                                                                                                                                                                                        | 7                  |
| 20 | Quotations           | Provide quotations from the primary studies to illustrate themes/constructs, and identify whether the quotations were participant quotations of the author's interpretation.                                                                                                                        | 15-22              |
| 21 | Synthesis output     | Present rich, compelling and useful results that go beyond a summary of the primary studies ( <i>e.g. new interpretation, models of evidence, conceptual models, analytical framework, development of a new theory or construct).</i>                                                               | 15-22              |

From: Tong A, Flemming K, McInnes E, et al. Enhancing transparency in reporting the synthesis of qualitative research: ENTREQ. *BMC Med Res Methodol* 2012; 12: 181-181. DOI: 10.1186/1471-2288-12-181.
